# Supplementary material for: Patients ‘ perspectives on bone replacement materials in a German university hospital setting
Source: PubMed Central journal article supplement (PMC10464219; doi:10.1186/s12938-023-01147-2), 2023-08-28
Supplement: 12938_2023_1147_MOESM1_ESM.pdf [file 12938_2023_1147_MOESM1_ESM.pdf]

## Additional information:

### Patients' perspective on bone replacement materials in a German university hospital setting

Ana Prates Soares, Heilwig Fischer, Vincenzo Orassi, Max Heiland, Sara Checa, Katharina Schmidt-Bleek, Carsten Rendenbach

|                                                                                                                                                                                                                                                                                                                                                                                                                                                                                                                                                                                                                                                                                                                                                                                                                                                               |
|---------------------------------------------------------------------------------------------------------------------------------------------------------------------------------------------------------------------------------------------------------------------------------------------------------------------------------------------------------------------------------------------------------------------------------------------------------------------------------------------------------------------------------------------------------------------------------------------------------------------------------------------------------------------------------------------------------------------------------------------------------------------------------------------------------------------------------------------------------------|
| <b>1. In welchem Zeitraum sind Sie geboren?</b><br>a. 1997-2004   b. 1981-1996   c. 1965-1980   d. 1946-1964   e. 1928-1945                                                                                                                                                                                                                                                                                                                                                                                                                                                                                                                                                                                                                                                                                                                                   |
| <b>2. Welches Geschlecht haben Sie?</b><br>a. Weiblich   b. Männlich   c. Divers                                                                                                                                                                                                                                                                                                                                                                                                                                                                                                                                                                                                                                                                                                                                                                              |
| <b>3. Was ist ihr höchster Bildungsabschluss?</b><br>a. Kein Schulabschluss   b. Grund-, Hauptschulabschluss   c. Realschule – mittlere Reife<br>d. Gymnasium – Abitur   e. Abgeschlossene Ausbildung   f. Fachhochschulreife<br>g. Hochschulabschluss   h. Promotion                                                                                                                                                                                                                                                                                                                                                                                                                                                                                                                                                                                         |
| <b>4. Wie ernähren Sie sich?</b><br>a. Omnivore Ernährung (keine Einschränkungen)   b. Bewusste Ernährung (ich esse selten Fleisch)<br>c. Vegetarier   d. Vegan                                                                                                                                                                                                                                                                                                                                                                                                                                                                                                                                                                                                                                                                                               |
| <b>5. Ein neues Knochenersatzmaterial hat vielversprechende Ergebnisse im Tierversuch gezeigt. Wären Sie bereit, sich dieses Knochenersatzmaterial implantieren zu lassen, auch, wenn noch keine Ergebnisse aus Studien am Menschen vorliegen?</b><br>a. Ja   b. Nein   c. Vielleicht                                                                                                                                                                                                                                                                                                                                                                                                                                                                                                                                                                         |
| <b>6. Stellen Sie sich vor, Ihr/e Arzt/Ärztin teilt Ihnen mit, dass eine Operation mit Einbringung einer Platte notwendig ist, um einen Knochenbruch zu versorgen. Wie viele Sorgen machen Sie sich um die folgenden Aspekte?</b><br><b>a. Notwendigkeit einer zweiten Operation</b><br>i. Keine   ii. Ein wenig   iii. Viele   iv. Sehr<br><b>b. Zeitlich begrenzte Einschränkung der Beweglichkeit oder Nahrungsaufnahme</b><br>i. Keine   ii. Ein wenig   iii. Viele   iv. Sehr<br><b>c. Permanente Implantate (Metall oder Keramik) in meinem Körper</b><br>i. Keine   ii. Ein wenig   iii. Viele   iv. Sehr                                                                                                                                                                                                                                              |
| <b>7. Stellen Sie sich vor, Ihr/e Arzt/Ärztin teilt Ihnen mit, dass eine Operation mit Einbringung einer Platte notwendig ist, um einen Knochenbruch zu versorgen. Wie viele Sorgen machen Sie sich um die folgenden Aspekte?</b><br><b>a. Es wird Ihnen selbst Knochen von einer anderen Körperregion entnommen und verwendet:</b><br>i. Immer   ii. Niemals   iii. Vielleicht<br><b>b. Knochen tierischen Ursprungs (verarbeitet und ohne Risiken für Leib und Leben) wird verwendet:</b><br>i. Immer   ii. Niemals   iii. Vielleicht<br><b>c. Knochen eines menschlichen Spenders (verarbeitet und ohne Risiken für Leib und Leben) wird verwendet:</b><br>i. Immer   ii. Niemals   iii. Vielleicht<br><b>d. Künstliches Knochenmaterial (verarbeitet und ohne Risiken für Leib und Leben) wird verwendet:</b><br>i. Immer   ii. Niemals   iii. Vielleicht |

- 8. Wenn das künstliche Knochenmaterial Zellen und/oder Blut enthalten würde, welcher der folgenden Optionen würden Sie zustimmen?**
- a. Zellen und Blut stammen von Ihnen selbst und werden mit dem Knochenmaterial vermischt**  
i. Ja    ii. Nein    iii. Vielleicht
- b. Zellen und Blut stammen von einem menschlichen Spender und werden mit dem Knochenmaterial vermischt**  
i. Ja    ii. Nein    iii. Vielleicht
- c. Zellen und Blut stammen von verschiedenen menschlichen Spendern und werden mit dem Knochenmaterial vermischt**  
i. Ja    ii. Nein    iii. Vielleicht

Supplementary table 1: The original questionnaire was applied in plain German language so that it could be understood and answered by a diverse population of survey participants.

|                                                      |                       | GenX /<br>Boomers /<br>Post-war | Milenials<br>/ GenZ | Female/<br>Diverse | Male | Post-<br>secondary<br>education | Until<br>secondary<br>education | Flexitarian/<br>Vegetarian<br>/Vegan | Omnivore |
|------------------------------------------------------|-----------------------|---------------------------------|---------------------|--------------------|------|---------------------------------|---------------------------------|--------------------------------------|----------|
| Clinical trial<br>participation<br>(n=187)           | <b>No</b>             | 12                              | 43                  | 31                 | 24   | 38                              | 17                              | 29                                   | 26       |
|                                                      | <b>Yes/maybe</b>      | 51                              | 81                  | 65                 | 67   | 84                              | 48                              | 71                                   | 61       |
|                                                      | <b>p=</b>             | <b>0.03</b>                     |                     | 0.37               |      | 0.48                            |                                 | 0.89                                 |          |
| Worry about 2nd<br>operation (n=172)                 | <b>Few / None</b>     | 35                              | 77                  | 61                 | 51   | 75                              | 37                              | 65                                   | 47       |
|                                                      | <b>Many / A lot</b>   | 24                              | 36                  | 30                 | 30   | 41                              | 19                              | 29                                   | 31       |
|                                                      | <b>p=</b>             | 0.25                            |                     | 0.58               |      | 0.86                            |                                 | 0.22                                 |          |
| Worry about<br>functional<br>limitations<br>(n=171)  | <b>Few / None</b>     | 32                              | 57                  | 44                 | 45   | 65                              | 24                              | 49                                   | 40       |
|                                                      | <b>Many / A lot</b>   | 27                              | 55                  | 47                 | 35   | 51                              | 31                              | 45                                   | 37       |
|                                                      | <b>p=</b>             | 0.68                            |                     | 0.30               |      | 0.13                            |                                 | 0.98                                 |          |
| Worry about<br>permanent<br>implants (n=173)         | <b>Few / None</b>     | 43                              | 75                  | 59                 | 59   | 73                              | 45                              | 65                                   | 53       |
|                                                      | <b>Many / A lot</b>   | 17                              | 38                  | 32                 | 23   | 44                              | 11                              | 29                                   | 26       |
|                                                      | <b>p=</b>             | 0.48                            |                     | 0.32               |      | <b>0.02</b>                     |                                 | 0.77                                 |          |
| Acceptance of<br>Autograft (n=167)                   | <b>Never</b>          | 3                               | 4                   | 3                  | 4    | 5                               | 2                               | 3                                    | 4        |
|                                                      | <b>Always / Maybe</b> | 56                              | 104                 | 86                 | 74   | 108                             | 52                              | 91                                   | 69       |
|                                                      | <b>p=</b>             | 0.67                            |                     | 0.57               |      | 0.83                            |                                 | 0.46                                 |          |
| Acceptance of<br>Xenograft (n=167)                   | <b>Never</b>          | 7                               | 6                   | 10                 | 3    | 11                              | 2                               | 7                                    | 6        |
|                                                      | <b>Always / Maybe</b> | 52                              | 102                 | 79                 | 75   | 102                             | 52                              | 87                                   | 67       |
|                                                      | <b>p=</b>             | 0.15                            |                     | 0.08               |      | 0.17                            |                                 | 0.85                                 |          |
| Acceptance of<br>Allograft (n=167)                   | <b>Never</b>          | 7                               | 7                   | 9                  | 5    | 10                              | 4                               | 8                                    | 6        |
|                                                      | <b>Always / Maybe</b> | 52                              | 101                 | 80                 | 73   | 103                             | 50                              | 86                                   | 67       |
|                                                      | <b>p=</b>             | 0.23                            |                     | 0.39               |      | 0.75                            |                                 | 0.95                                 |          |
| Acceptance of<br>Alloplastic<br>(n=167)              | <b>Never</b>          | 3                               | 0                   | 1                  | 2    | 2                               | 1                               | 2                                    | 1        |
|                                                      | <b>Always / Maybe</b> | 56                              | 108                 | 88                 | 76   | 111                             | 53                              | 92                                   | 72       |
|                                                      | <b>p=</b>             | <b>0.02</b>                     |                     | 0.48               |      | 0.97                            |                                 | 0.71                                 |          |
| Agree to material<br>containing own<br>cells (n=163) | <b>No</b>             | 1                               | 0                   | 0                  | 1    | 0                               | 1                               | 1                                    | 0        |
|                                                      | <b>Yes/Maybe</b>      | 56                              | 106                 | 88                 | 74   | 111                             | 51                              | 91                                   | 71       |
|                                                      | <b>p=</b>             | 0.17                            |                     | 0.28               |      | 0.14                            |                                 | 0.38                                 |          |
|                                                      | <b>No</b>             | 7                               | 10                  | 11                 | 6    | 14                              | 3                               | 13                                   | 4        |

|                                                                      |                  |      |    |      |    |      |    |      |    |
|----------------------------------------------------------------------|------------------|------|----|------|----|------|----|------|----|
| Agree to material containing cells/blood from a single donor (n=163) | <b>Yes/Maybe</b> | 50   | 96 | 77   | 69 | 97   | 49 | 79   | 67 |
|                                                                      | <b>p=</b>        | 0.57 |    | 0.35 |    | 0.18 |    | 0.08 |    |
| Agree to material containing cells/blood from pooled donors (n=163)  | <b>No</b>        | 17   | 22 | 25   | 14 | 32   | 7  | 26   | 13 |
|                                                                      | <b>Yes/Maybe</b> | 40   | 84 | 63   | 61 | 79   | 45 | 66   | 58 |
|                                                                      | <b>p=</b>        | 0.20 |    | 0.15 |    | 0.03 |    | 0.14 |    |

Supplementary Table 2: Dichotomized data arranged in contingency tables to test the influence of different respondents characteristics, like generation (Post-war/Boomers /GenX or Milenials /GenZ), gender (female/diverse or male), education level (post-secondary education (Vocational training/Technical school/University education/Post-graduation) or until secondary education (No school certificate/Elementary school/Middle school/ High school)), and nutrition (Flexitarian/Vegetarian /Vegan or Omnivore) on the responses to the queries about bone replacement material and procedures. Statistical significance tested using either Pearson's chi-square test or Fischer's test ( $p < 0.05$  represented in green).
